# Supplementary material for: Health Apps for Combating COVID-19: Descriptive Review and Taxonomy
Source: PubMed Central journal article supplement (PMC7927949; doi:10.2196/24322), 2021-03-02
Supplement: mhealth_v9i3e24322_app2.pdf [file mhealth_v9i3e24322_app2.pdf]

## Appendix 2

The table below presents the occurrence of excerpts in each app included in this review.

### Technical Features (Codes)

| App Name (N=109)              | Alert contacts | Basic health information and advice or FAQ | Chatbot | Checklist of surfaces that have to be disinfected | Contact tracing | Distance detection | Gadget of self-assessment | Health or travel declaration | Helpline | Information about health services and care lines | Latest news | List of products | Live statistics and rolling updates (push notifications) | Live statistics and rolling updates (RSS feeds) | Location monitoring | Making medical appointments | Map | Medical check-up tracking | Medical report generator | Medication tracking and reminders | Mood tracking and mental status | Movement permits | Recruitment of volunteers | Remote monitoring | Results of Covid-19 laboratory test | Sharing data or story with others | Symptoms tracker | Taking photos of surfaces | Virtual medical consultation | Wearable devices for symptoms tracking | Totals |
|-------------------------------|----------------|--------------------------------------------|---------|---------------------------------------------------|-----------------|--------------------|---------------------------|------------------------------|----------|--------------------------------------------------|-------------|------------------|----------------------------------------------------------|-------------------------------------------------|---------------------|-----------------------------|-----|---------------------------|--------------------------|-----------------------------------|---------------------------------|------------------|---------------------------|-------------------|-------------------------------------|-----------------------------------|------------------|---------------------------|------------------------------|----------------------------------------|--------|
| Covid-19 Czechia              | 0              | 1                                          | 0       | 0                                                 | 0               | 0                  | 0                         | 0                            | 0        | 0                                                | 1           | 0                | 0                                                        | 1                                               | 0                   | 0                           | 1   | 0                         | 0                        | 0                                 | 0                               | 0                | 0                         | 0                 | 0                                   | 0                                 | 0                | 0                         | 0                            | 0                                      | 4      |
| TraceCovid                    | 0              | 0                                          | 0       | 0                                                 | 1               | 0                  | 0                         | 0                            | 0        | 0                                                | 0           | 0                | 0                                                        | 0                                               | 0                   | 0                           | 0   | 0                         | 0                        | 0                                 | 0                               | 0                | 0                         | 0                 | 0                                   | 0                                 | 0                | 0                         | 0                            | 0                                      | 1      |
| HealthLynked COVID-19 Tracker | 1              | 0                                          | 1       | 0                                                 | 0               | 0                  | 1                         | 0                            | 0        | 0                                                | 1           | 0                | 0                                                        | 0                                               | 0                   | 0                           | 1   | 0                         | 0                        | 0                                 | 0                               | 0                | 0                         | 0                 | 0                                   | 0                                 | 1                | 0                         | 0                            | 0                                      | 6      |
| Covid-19 Vietnam              | 0              | 1                                          | 1       | 0                                                 | 0               | 0                  | 0                         | 1                            | 0        | 1                                                | 1           | 0                | 0                                                        | 0                                               | 0                   | 0                           | 1   | 0                         | 0                        | 0                                 | 0                               | 0                | 0                         | 0                 | 0                                   | 0                                 | 0                | 0                         | 1                            | 0                                      | 7      |
| Bluezone                      | 1              | 0                                          | 0       | 0                                                 | 0               | 0                  | 0                         | 0                            | 0        | 0                                                | 0           | 0                | 0                                                        | 0                                               | 0                   | 0                           | 0   | 0                         | 0                        | 0                                 | 0                               | 0                | 0                         | 0                 | 0                                   | 0                                 | 0                | 0                         | 0                            | 0                                      | 1      |
| COVID-19 Medisch Dossier      | 0              | 1                                          | 0       | 0                                                 | 0               | 0                  | 0                         | 0                            | 0        | 0                                                | 0           | 0                | 1                                                        | 1                                               | 0                   | 0                           | 0   | 0                         | 0                        | 0                                 | 0                               | 0                | 0                         | 0                 | 0                                   | 0                                 | 0                | 0                         | 0                            | 0                                      | 3      |
| Corona FACTS                  | 0              | 1                                          | 0       | 0                                                 | 0               | 0                  | 0                         | 0                            | 0        | 0                                                | 1           | 0                | 0                                                        | 0                                               | 0                   | 0                           | 1   | 0                         | 0                        | 0                                 | 0                               | 0                | 0                         | 0                 | 0                                   | 1                                 | 0                | 0                         | 0                            | 0                                      | 4      |
| Plan Jalisco Covid-19         | 0              | 1                                          | 0       | 0                                                 | 1               | 0                  | 0                         | 0                            | 0        | 0                                                | 0           | 0                | 0                                                        | 0                                               | 0                   | 0                           | 0   | 0                         | 0                        | 0                                 | 0                               | 0                | 0                         | 0                 | 0                                   | 0                                 | 0                | 0                         | 0                            | 0                                      | 2      |
| PatientMpower for COVID-19    | 0              | 0                                          | 0       | 0                                                 | 0               | 0                  | 0                         | 0                            | 0        | 0                                                | 0           | 0                | 0                                                        | 0                                               | 1                   | 0                           | 0   | 0                         | 0                        | 0                                 | 0                               | 0                | 0                         | 1                 | 0                                   | 0                                 | 0                | 0                         | 0                            | 1                                      | 3      |
| CDC                           | 0              | 1                                          | 0       | 0                                                 | 0               | 0                  | 0                         | 0                            | 0        | 0                                                | 1           | 0                | 1                                                        | 0                                               | 0                   | 0                           | 0   | 0                         | 0                        | 0                                 | 0                               | 0                | 0                         | 0                 | 0                                   | 0                                 | 0                | 0                         | 0                            | 0                                      | 3      |
| Coronavirus-SUS               | 0              | 1                                          | 0       | 0                                                 | 0               | 0                  | 0                         | 0                            | 0        | 0                                                | 1           | 0                | 0                                                        | 0                                               | 0                   | 0                           | 1   | 0                         | 0                        | 0                                 | 0                               | 0                | 0                         | 0                 | 0                                   | 0                                 | 0                | 0                         | 0                            | 0                                      | 3      |
| Cova Punjab                   | 0              | 1                                          | 0       | 0                                                 | 0               | 0                  | 0                         | 0                            | 1        | 0                                                | 0           | 0                | 1                                                        | 1                                               | 0                   | 0                           | 0   | 0                         | 0                        | 0                                 | 0                               | 0                | 0                         | 0                 | 0                                   | 0                                 | 0                | 0                         | 0                            | 0                                      | 4      |
| Disinfection Checklist        | 0              | 0                                          | 0       | 1                                                 | 0               | 0                  | 0                         | 0                            | 0        | 0                                                | 0           | 1                | 0                                                        | 0                                               | 0                   | 0                           | 0   | 0                         | 0                        | 0                                 | 0                               | 0                | 0                         | 0                 | 0                                   | 0                                 | 0                | 1                         | 0                            | 0                                      | 3      |
| NCOVI                         | 0              | 1                                          | 0       | 0                                                 | 0               | 0                  | 0                         | 1                            | 0        | 0                                                | 0           | 0                | 0                                                        | 1                                               | 0                   | 0                           | 0   | 0                         | 0                        | 0                                 | 0                               | 0                | 0                         | 0                 | 0                                   | 0                                 | 0                | 0                         | 0                            | 0                                      | 3      |
| Patientsphere for Covid19     | 0              | 0                                          | 0       | 0                                                 | 0               | 0                  | 0                         | 0                            | 0        | 0                                                | 0           | 0                | 0                                                        | 0                                               | 0                   | 0                           | 0   | 0                         | 0                        | 1                                 | 0                               | 0                | 0                         | 0                 | 0                                   | 1                                 | 1                | 0                         | 0                            | 0                                      | 3      |
| Coronavirus Australia         | 0              | 1                                          | 0       | 0                                                 | 0               | 0                  | 1                         | 0                            | 0        | 0                                                | 1           | 0                | 1                                                        | 0                                               | 0                   | 0                           | 0   | 0                         | 0                        | 0                                 | 0                               | 0                | 0                         | 0                 | 0                                   | 0                                 | 0                | 0                         | 0                            | 0                                      | 4      |
| Coronavirus UY                | 0              | 0                                          | 0       | 0                                                 | 0               | 0                  | 1                         | 0                            | 0        | 0                                                | 0           | 0                | 0                                                        | 0                                               | 0                   | 0                           | 0   | 0                         | 0                        | 0                                 | 0                               | 0                | 0                         | 0                 | 0                                   | 0                                 | 0                | 0                         | 0                            | 0                                      | 1      |
| Covid-19 UAE                  | 0              | 0                                          | 0       | 0                                                 | 0               | 0                  | 0                         | 0                            | 1        | 0                                                | 1           | 0                | 0                                                        | 0                                               | 0                   | 0                           | 0   | 0                         | 0                        | 0                                 | 0                               | 0                | 0                         | 0                 | 0                                   | 0                                 | 0                | 0                         | 0                            | 0                                      | 2      |
| Stop Covid19                  | 0              | 0                                          | 0       | 0                                                 | 0               | 0                  | 1                         | 0                            | 0        | 0                                                | 0           | 0                | 0                                                        | 0                                               | 0                   | 0                           | 1   | 0                         | 0                        | 0                                 | 0                               | 0                | 0                         | 0                 | 0                                   | 0                                 | 0                | 0                         | 0                            | 0                                      | 2      |
| Canada Covid-19               | 0              | 1                                          | 0       | 0                                                 | 0               | 0                  | 0                         | 0                            | 0        | 0                                                | 1           | 0                | 0                                                        | 0                                               | 0                   | 0                           | 0   | 0                         | 0                        | 0                                 | 0                               | 0                | 0                         | 0                 | 0                                   | 0                                 | 0                | 0                         | 0                            | 0                                      | 2      |
| AarogyaSetu                   | 0              | 1                                          | 0       | 0                                                 | 0               | 0                  | 0                         | 0                            | 0        | 0                                                | 0           | 0                | 0                                                        | 0                                               | 0                   | 0                           | 0   | 0                         | 0                        | 0                                 | 0                               | 0                | 0                         | 0                 | 0                                   | 0                                 | 0                | 0                         | 0                            | 0                                      | 1      |
| Covid-19 Armenia              | 0              | 0                                          | 0       | 0                                                 | 0               | 0                  | 1                         | 0                            | 0        | 0                                                | 1           | 0                | 0                                                        | 0                                               | 0                   | 0                           | 0   | 0                         | 0                        | 0                                 | 0                               | 0                | 0                         | 0                 | 0                                   | 0                                 | 0                | 0                         | 0                            | 0                                      | 2      |
| Family-Covid19                | 0              | 0                                          | 0       | 0                                                 | 0               | 0                  | 0                         | 1                            | 0        | 0                                                | 0           | 0                | 0                                                        | 0                                               | 0                   | 0                           | 0   | 0                         | 0                        | 0                                 | 0                               | 0                | 0                         | 0                 | 0                                   | 0                                 | 0                | 0                         | 0                            | 0                                      | 1      |
| Trecovid19                    | 0              | 1                                          | 0       | 0                                                 | 0               | 0                  | 0                         | 0                            | 0        | 0                                                | 0           | 0                | 0                                                        | 0                                               | 0                   | 0                           | 0   | 0                         | 0                        | 0                                 | 0                               | 0                | 0                         | 0                 | 0                                   | 0                                 | 0                | 0                         | 0                            | 0                                      | 1      |
| Covive                        | 0              | 1                                          | 0       | 0                                                 | 0               | 0                  | 1                         | 0                            | 0        | 0                                                | 0           | 0                | 0                                                        | 0                                               | 0                   | 0                           | 0   | 0                         | 0                        | 0                                 | 0                               | 0                | 0                         | 0                 | 0                                   | 0                                 | 1                | 0                         | 0                            | 0                                      | 3      |
